# Supplementary material for: Helicobacter pylori infection has a detrimental impact on the efficacy of cancer immunotherapies
Source: HighWire-hosted journal article supplement (doi:10.1136/gutjnl-2020-323392), 2021-07-12
Supplement: gutjnl-2020-323392supp001_data_supplement.pdf [file gutjnl-2020-323392supp001_data_supplement.pdf]

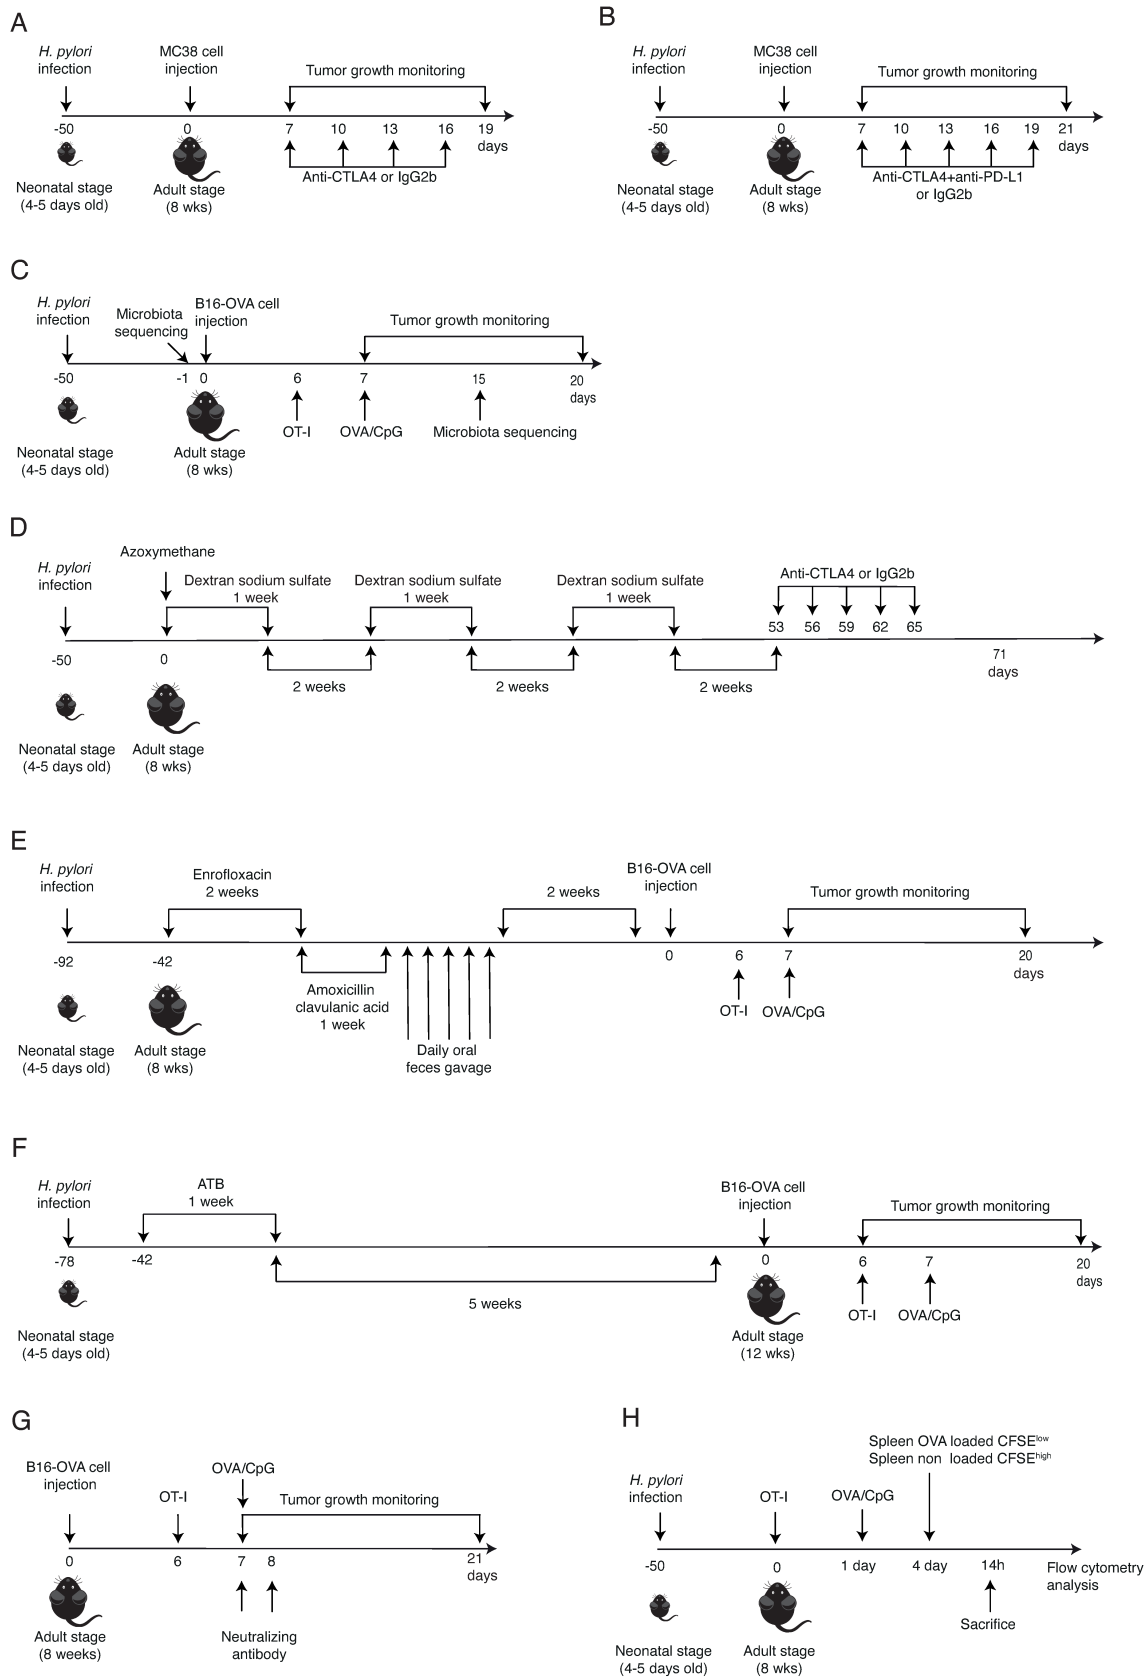

Supplementary figure 1. Description of the mouse tumor models.

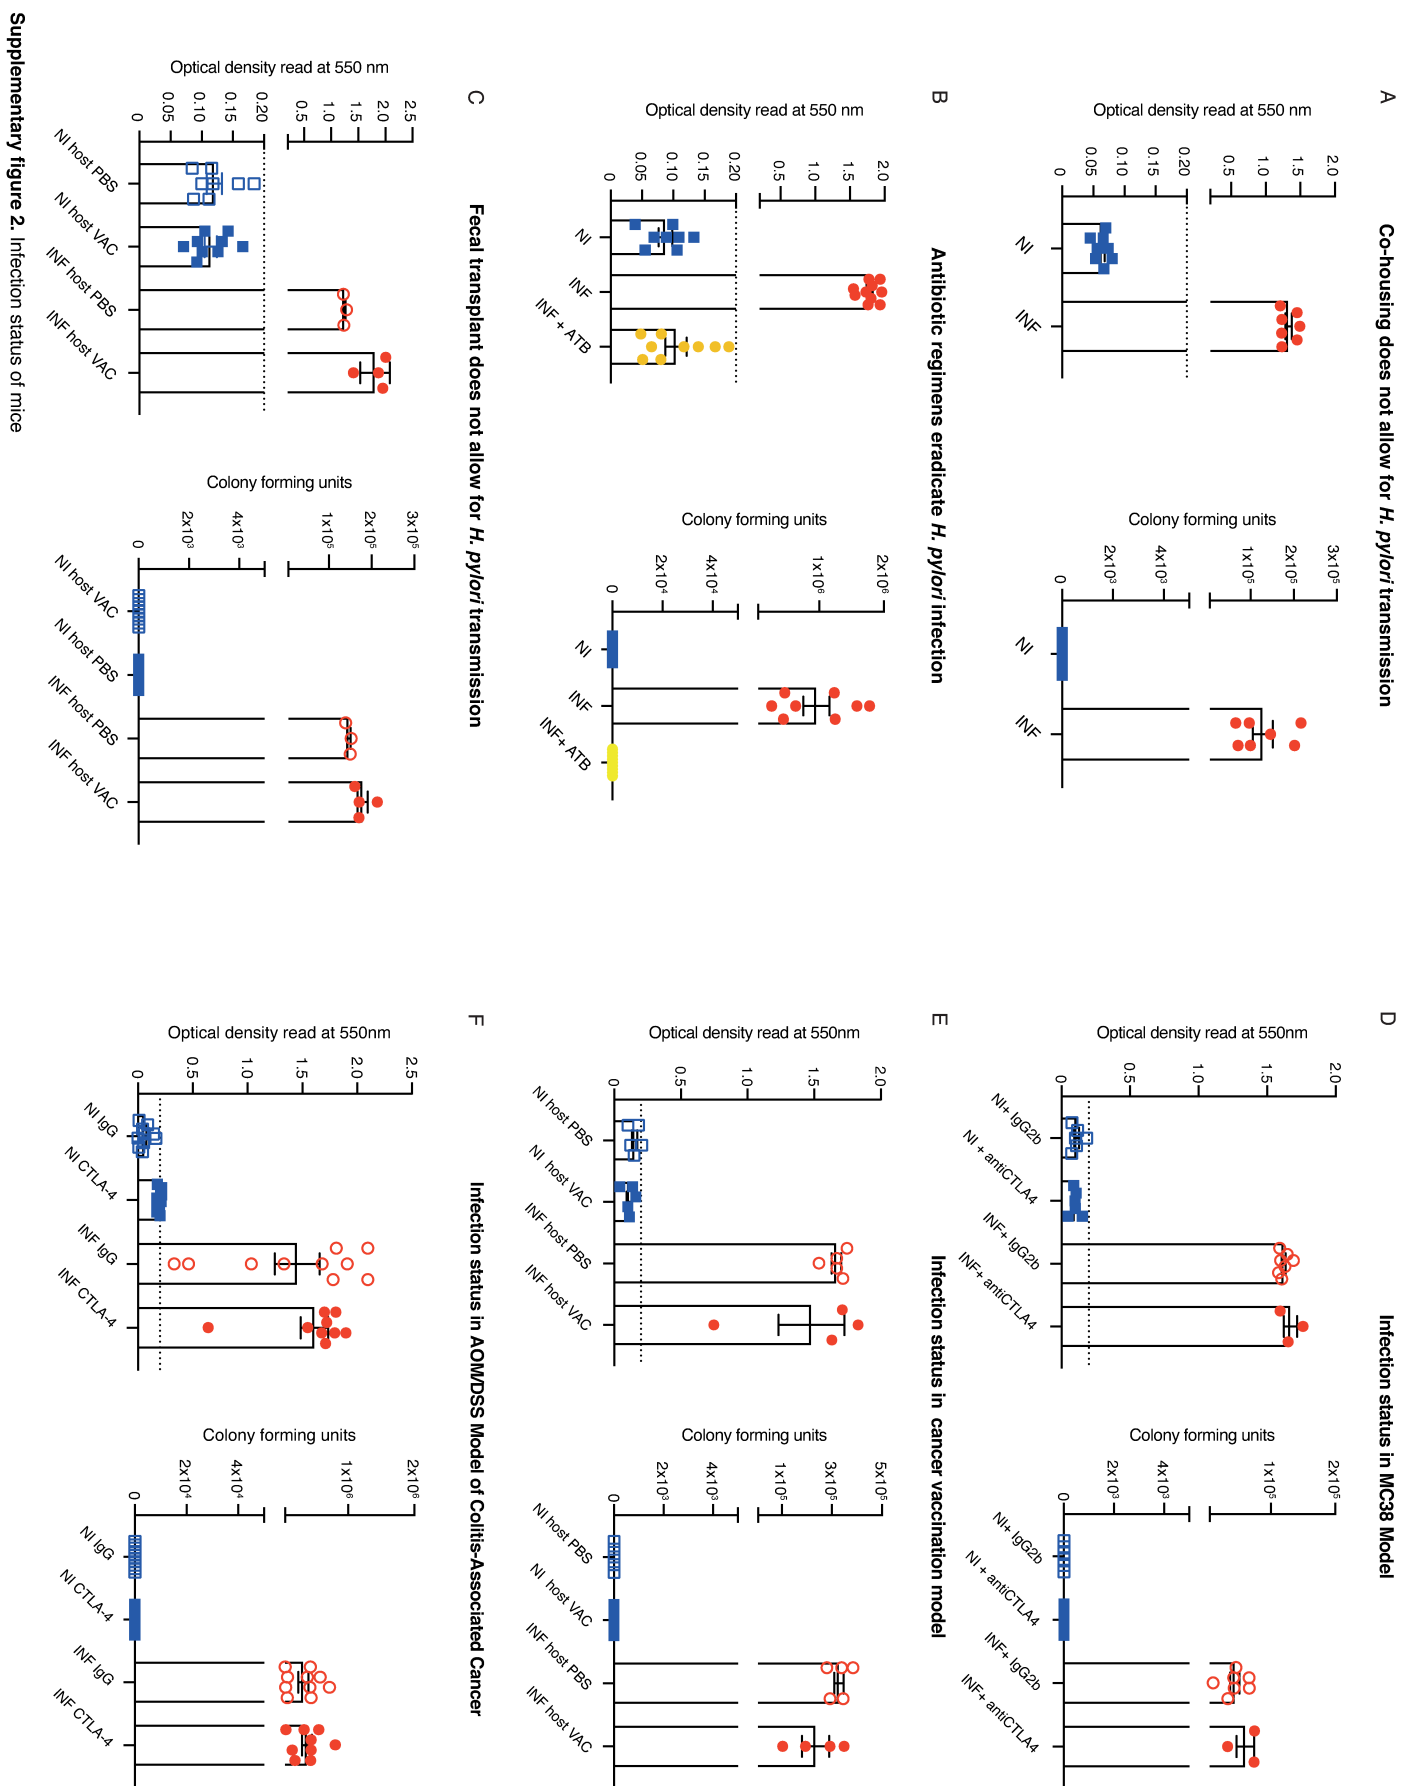

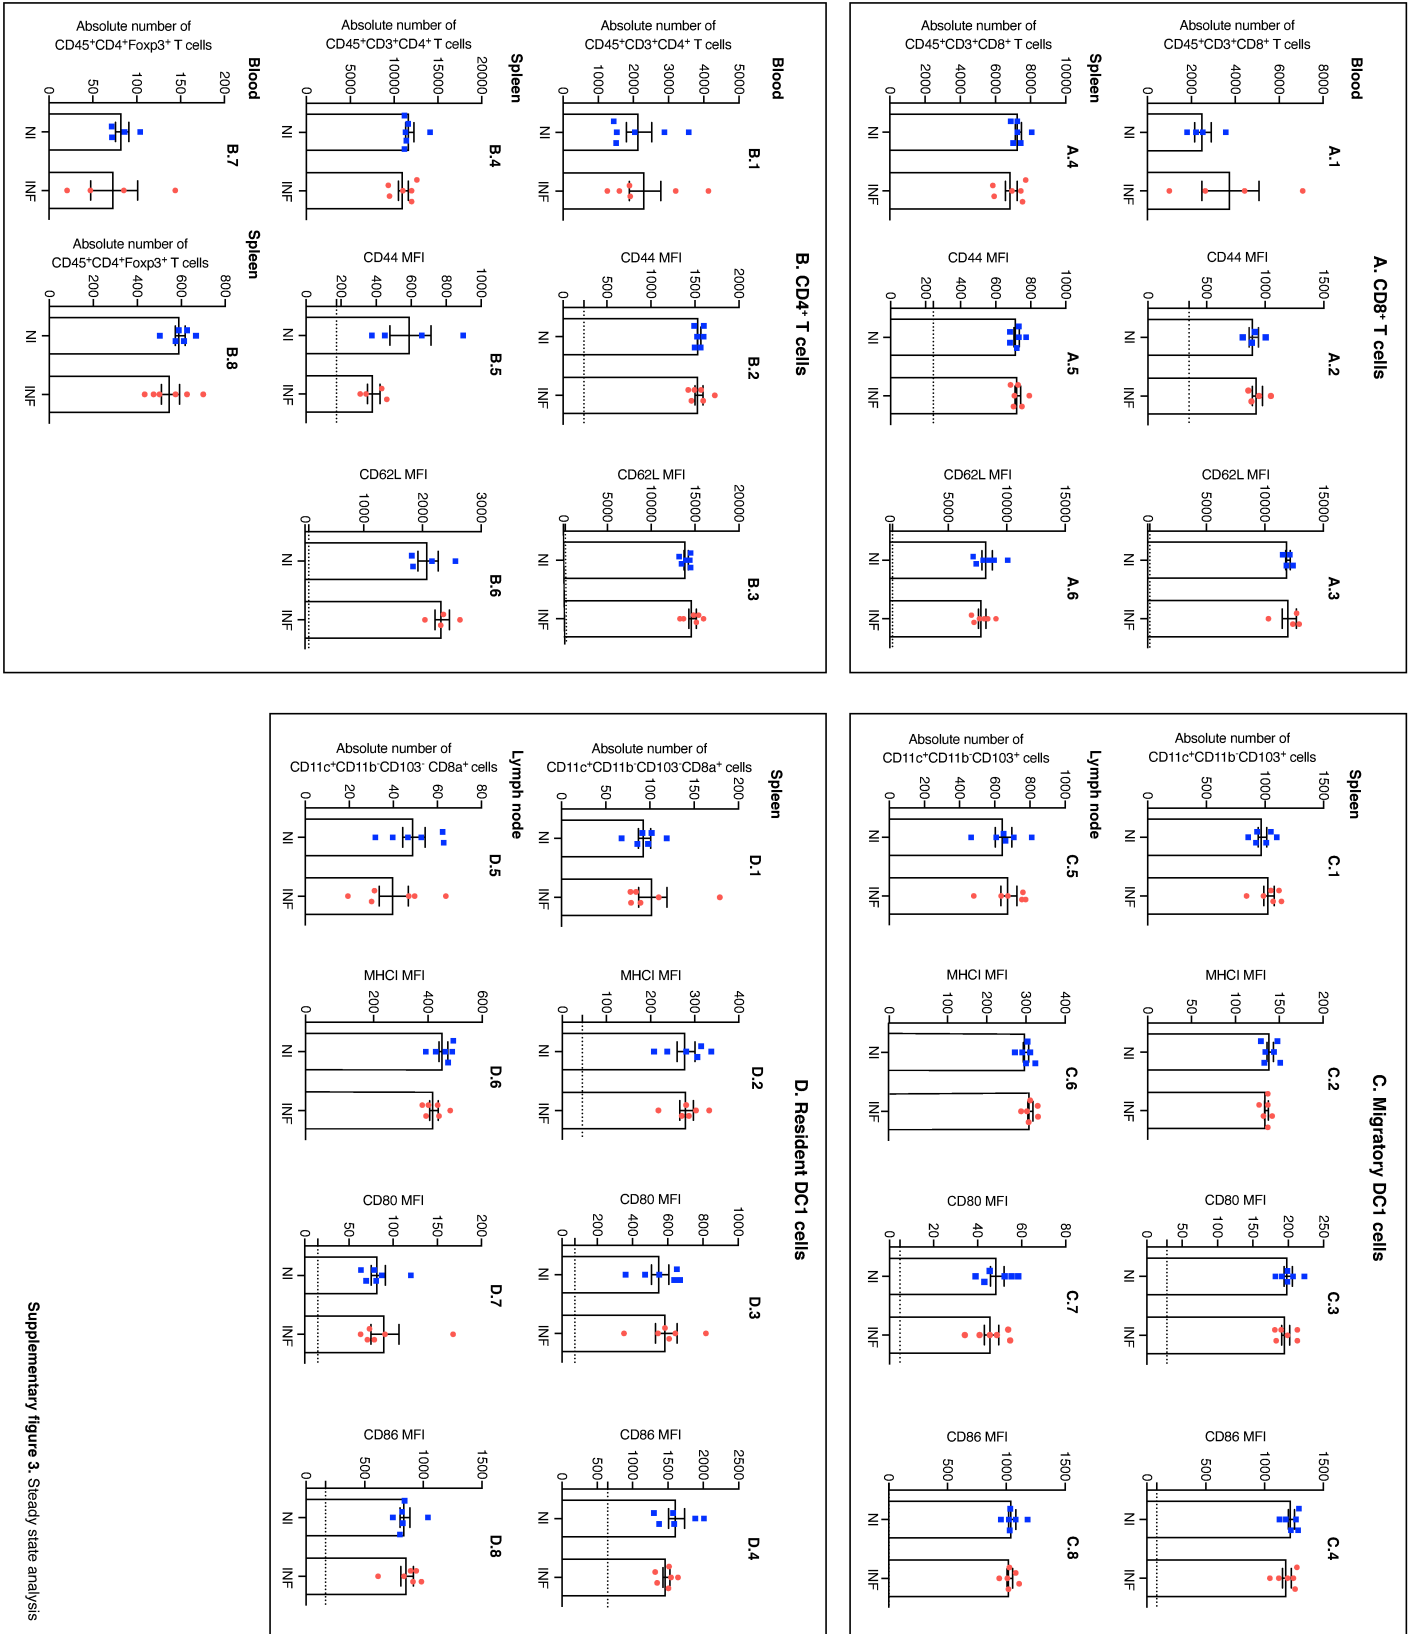

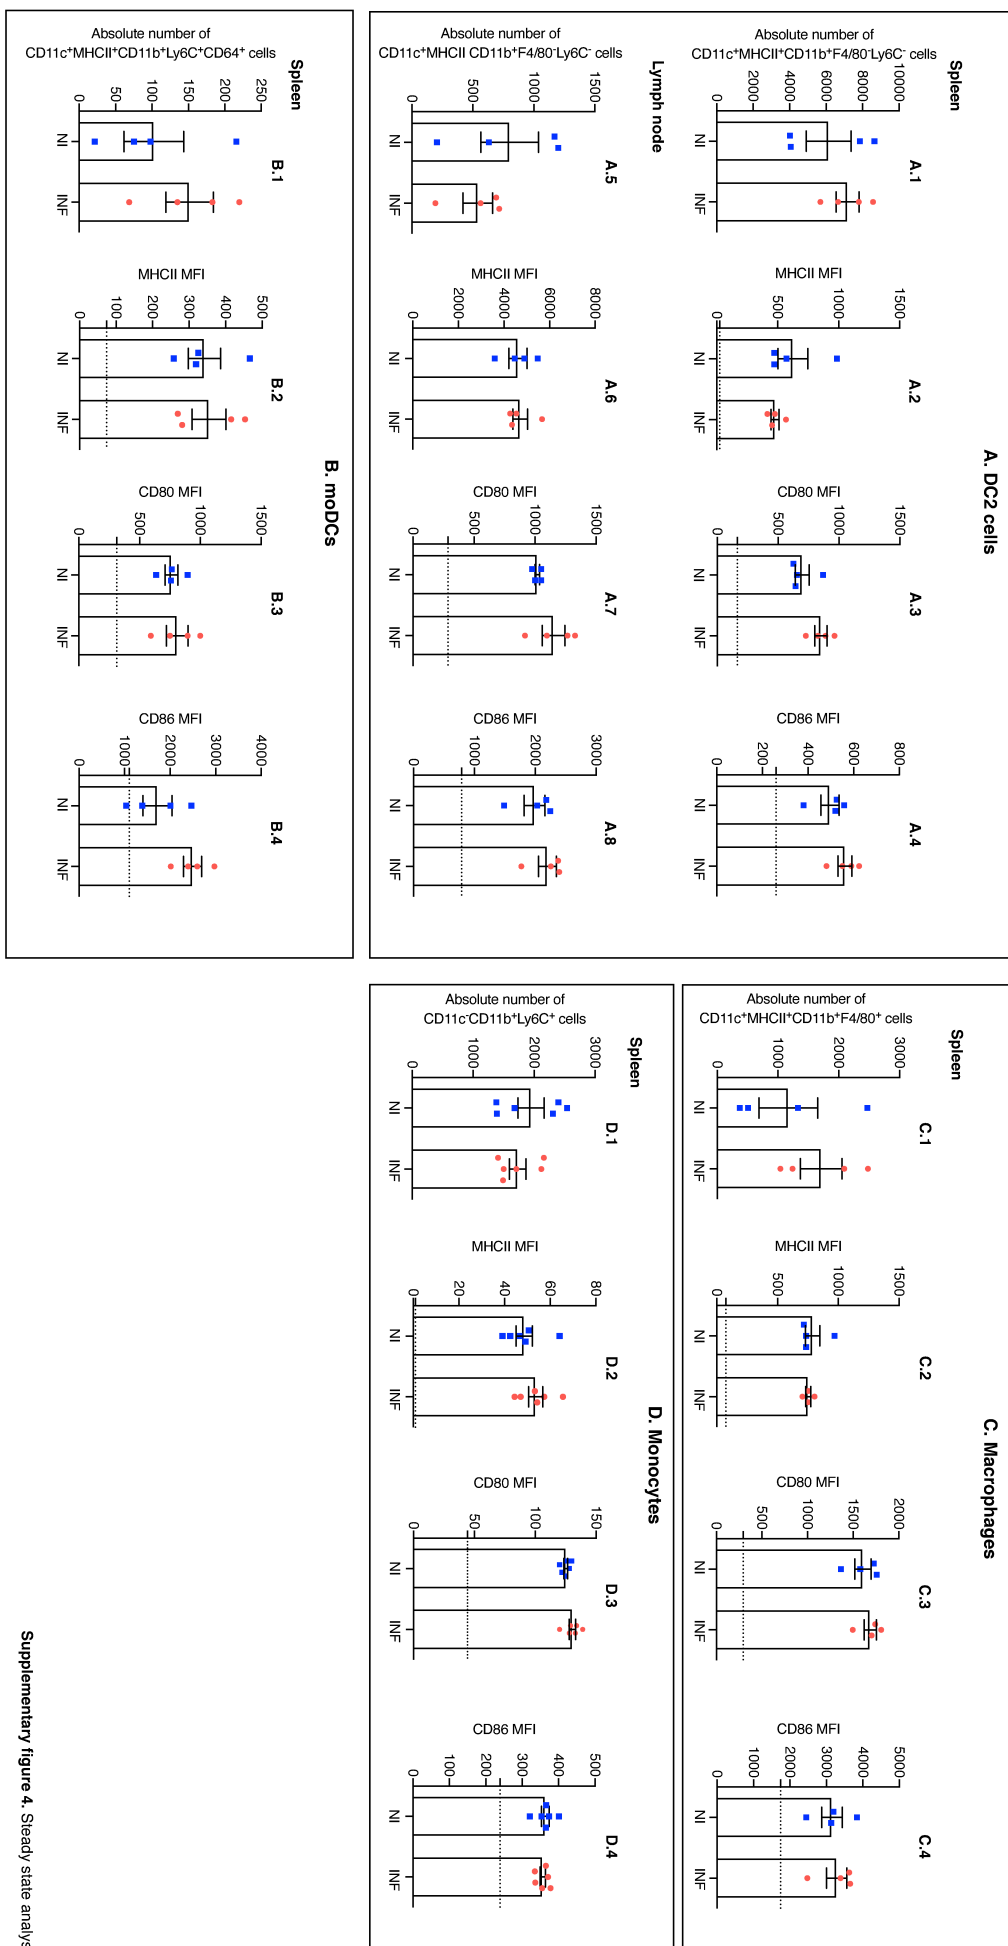

Supplementary figure 4. Steady state analysis

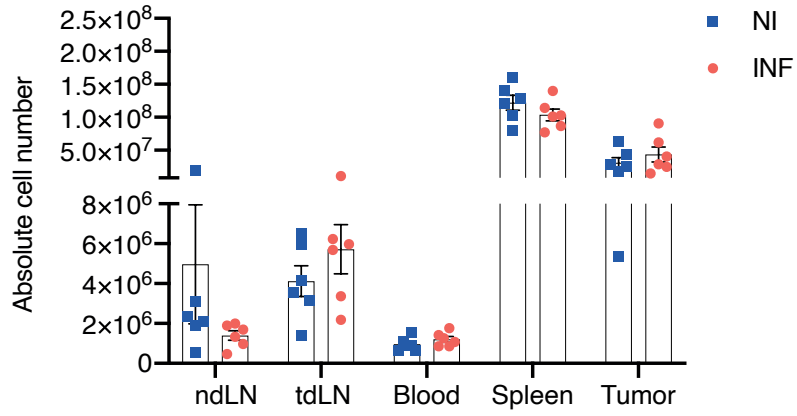

Supplementary figure 5. Cell Counts

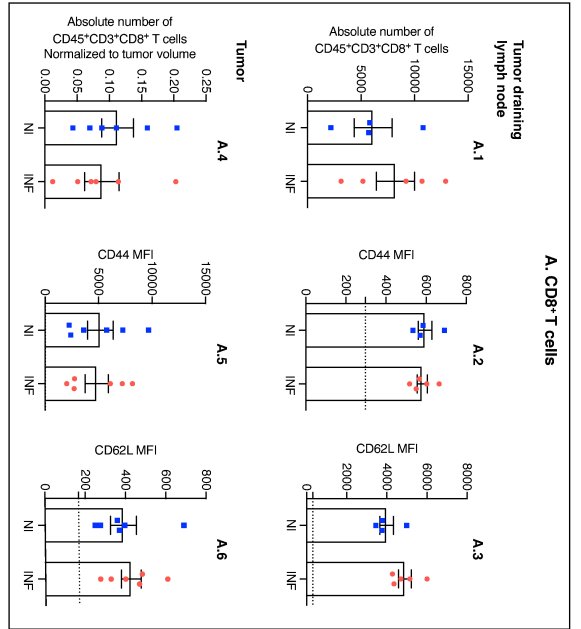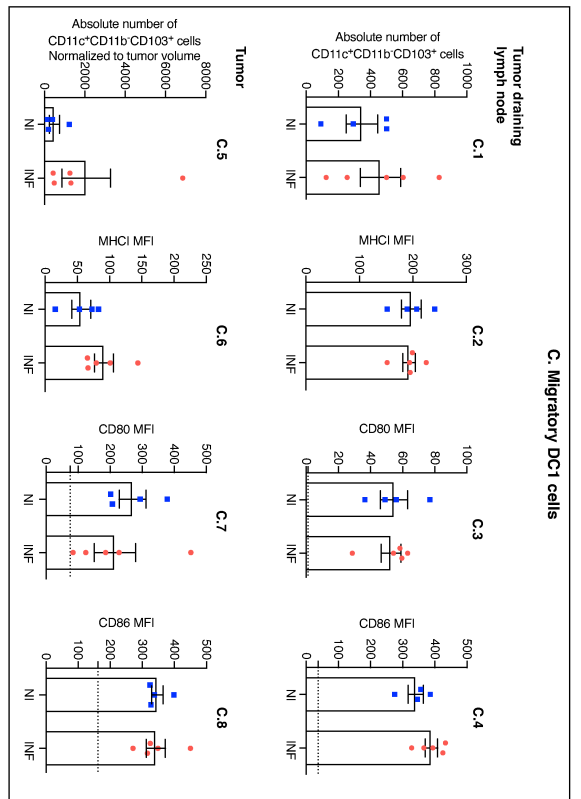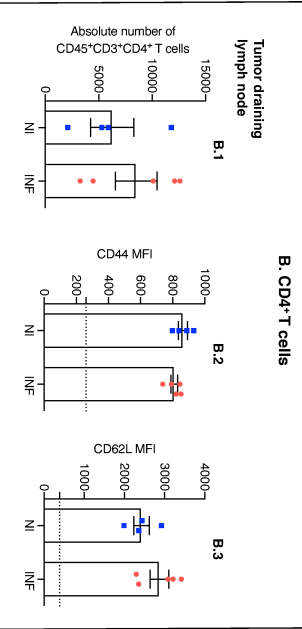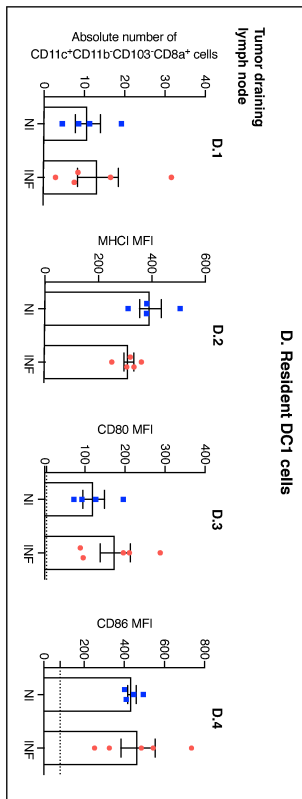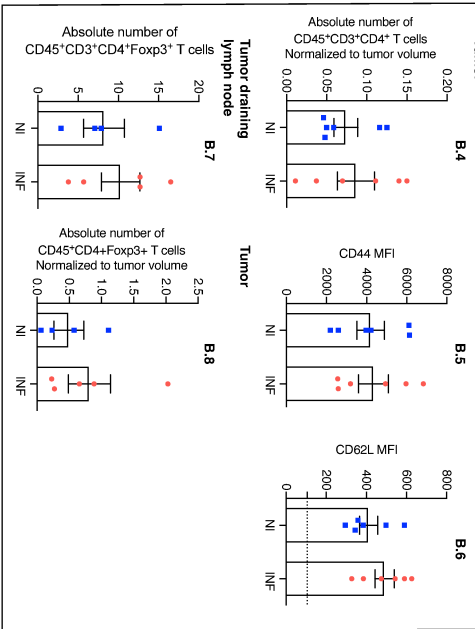

Supplementary Figure 6. MC38 Tumor-bearing mice

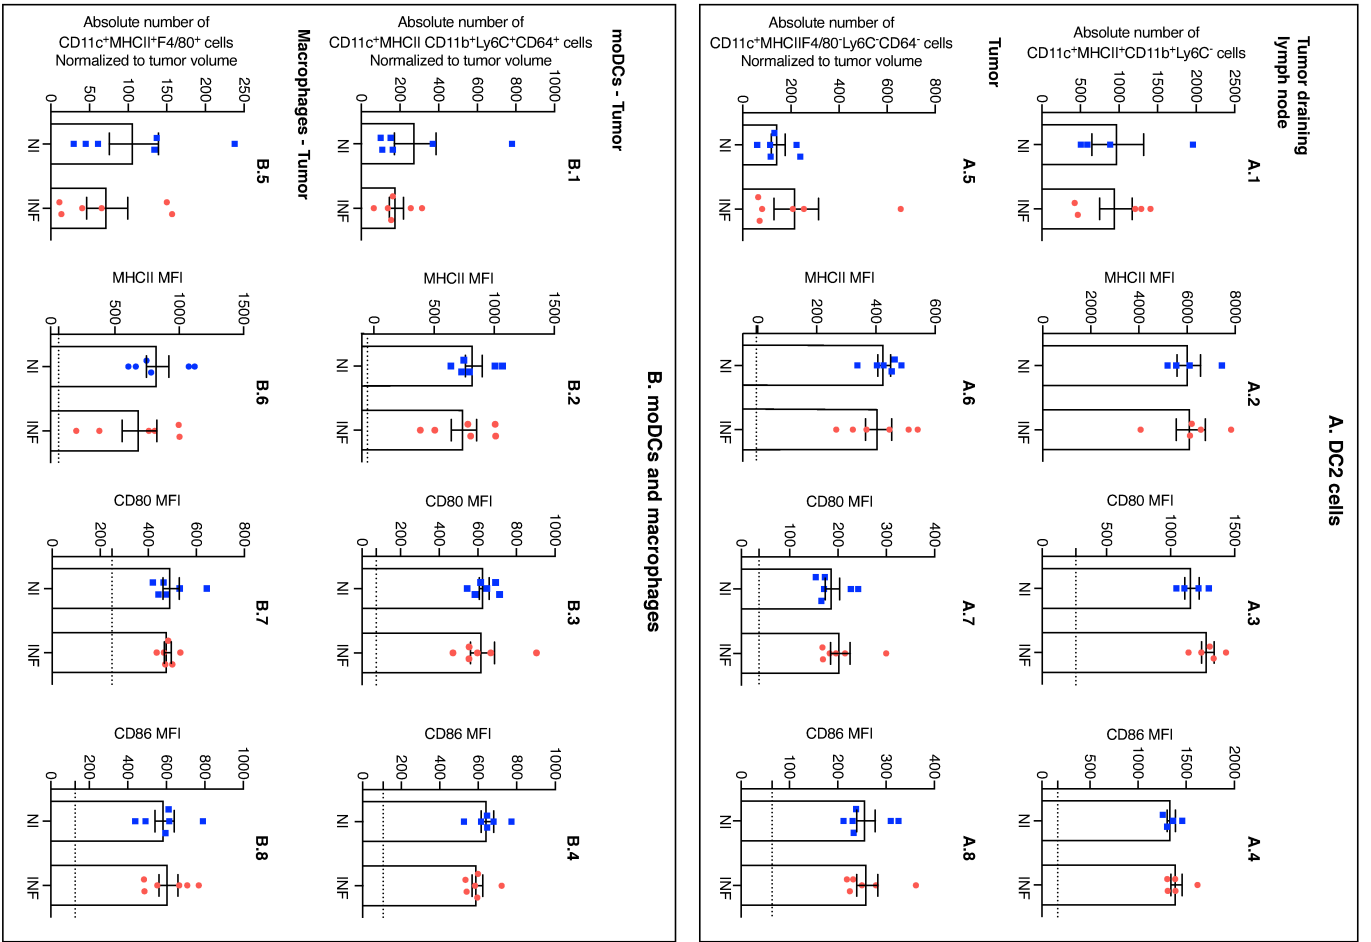

Supplementary figure 7. MC38 Tumor-bearing mice

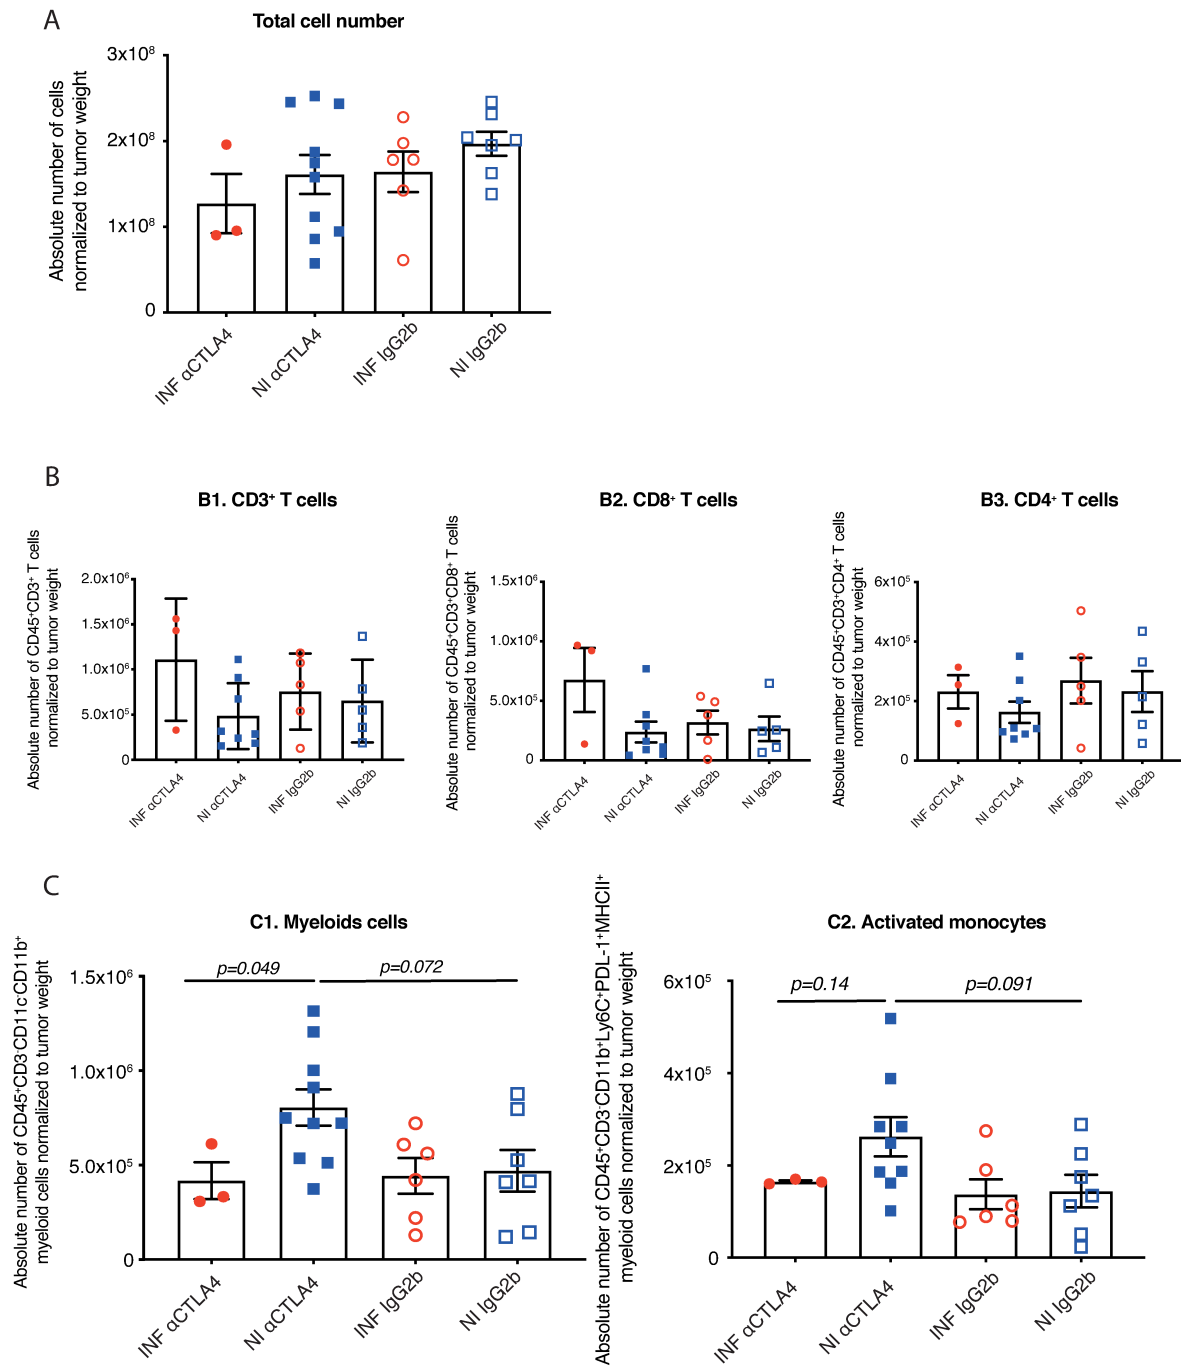**Supplementary figure 8.**

*H. pylori* substantially affects tumor myeloids cells in MC38 tumor-bearing mice undergoing anti-CTLA4 immunotherapy.



**A Absolute number and activation status of OT-I cells**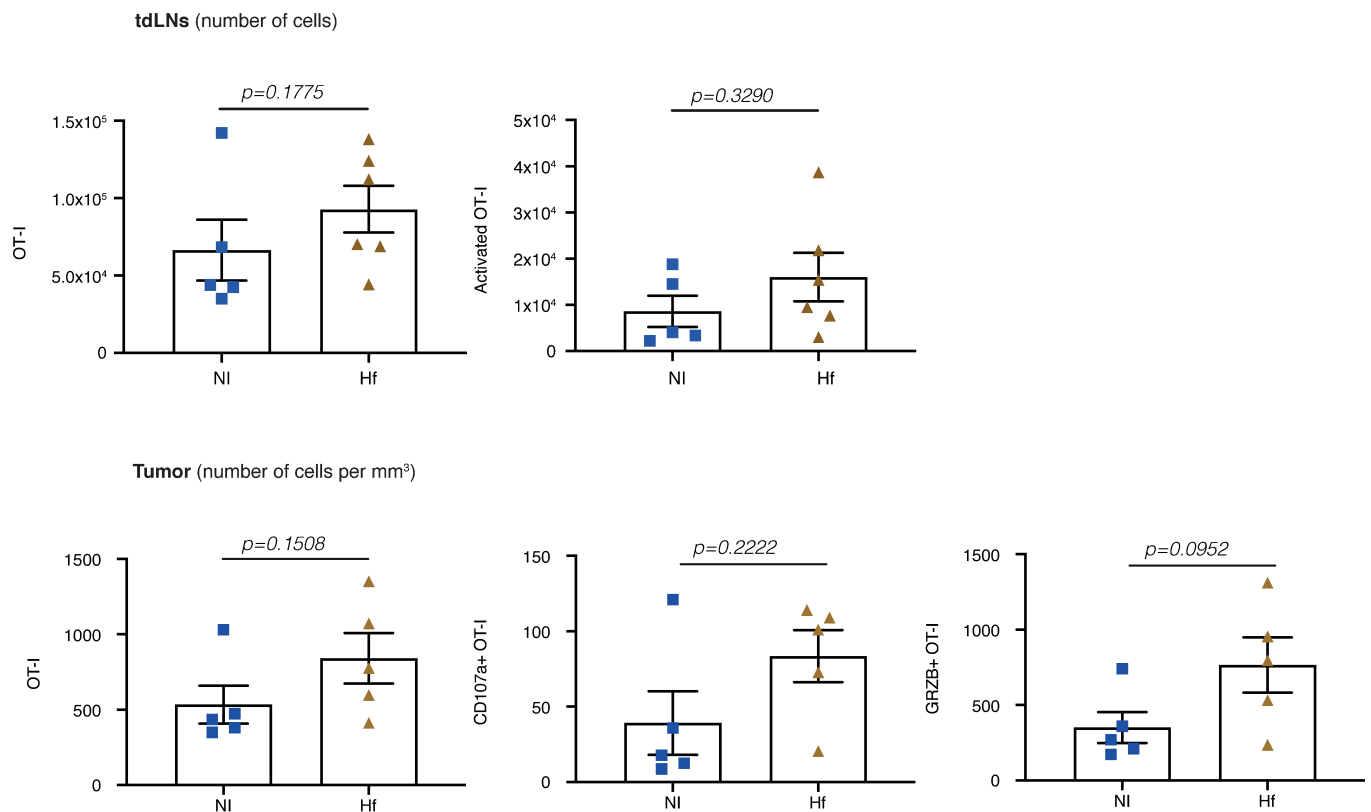**B Vaccine-induced cytotoxic activities of OT-I cells**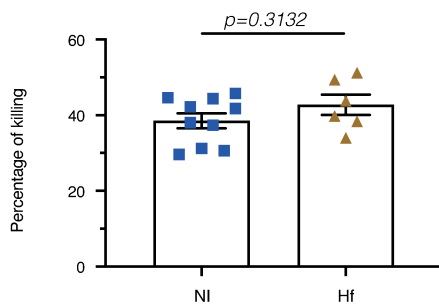**Supplementary figure 9.** *H. felis* infection does not jeopardize the tumor specific immune response

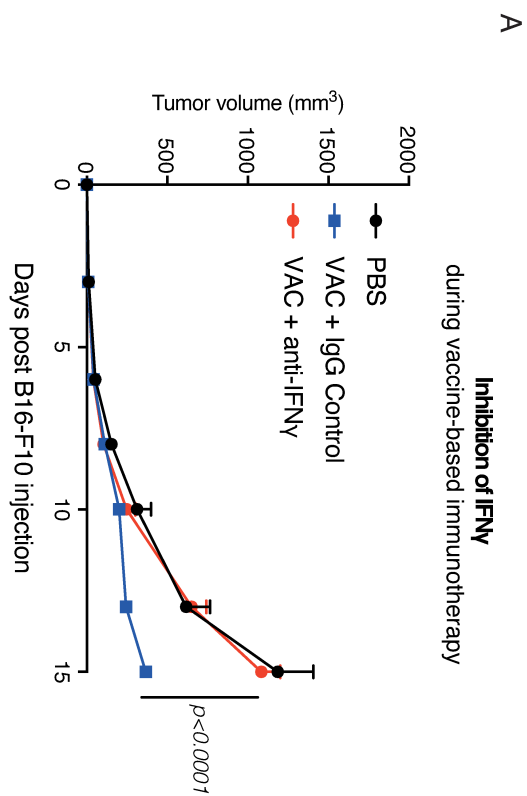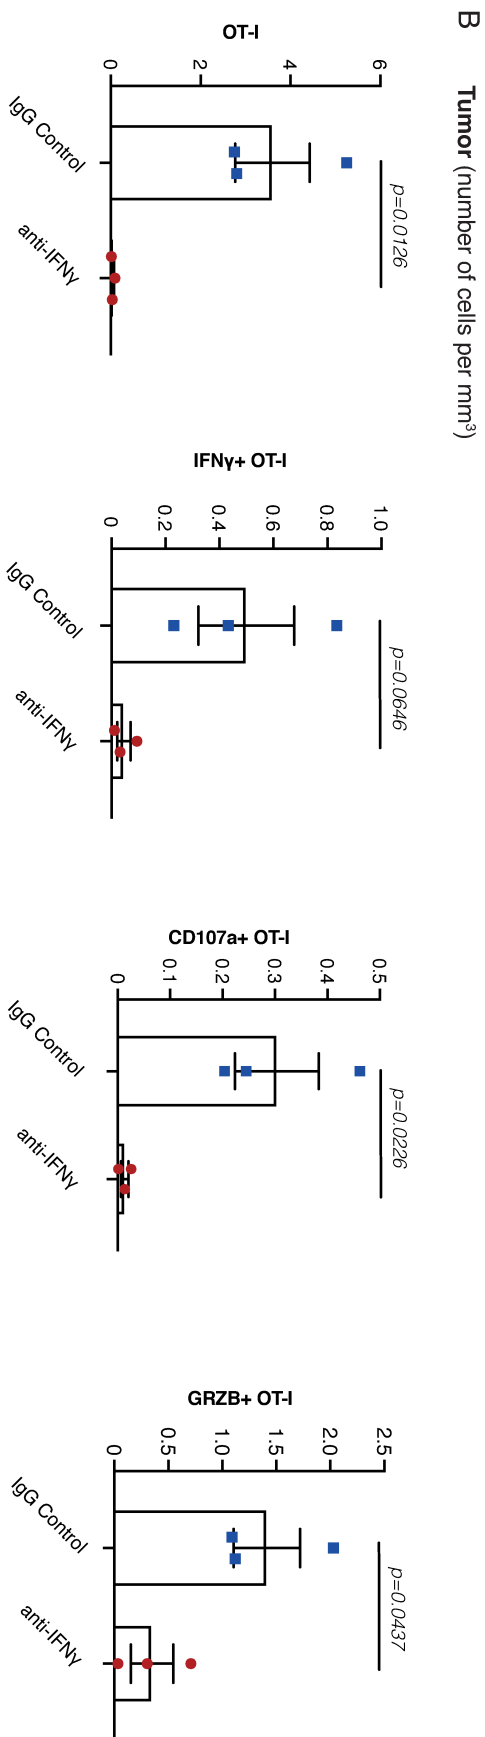

Supplementary figure 10. Effect of neutralization of IFN $\gamma$  on the efficacy of vaccine-based cancer immunotherapy

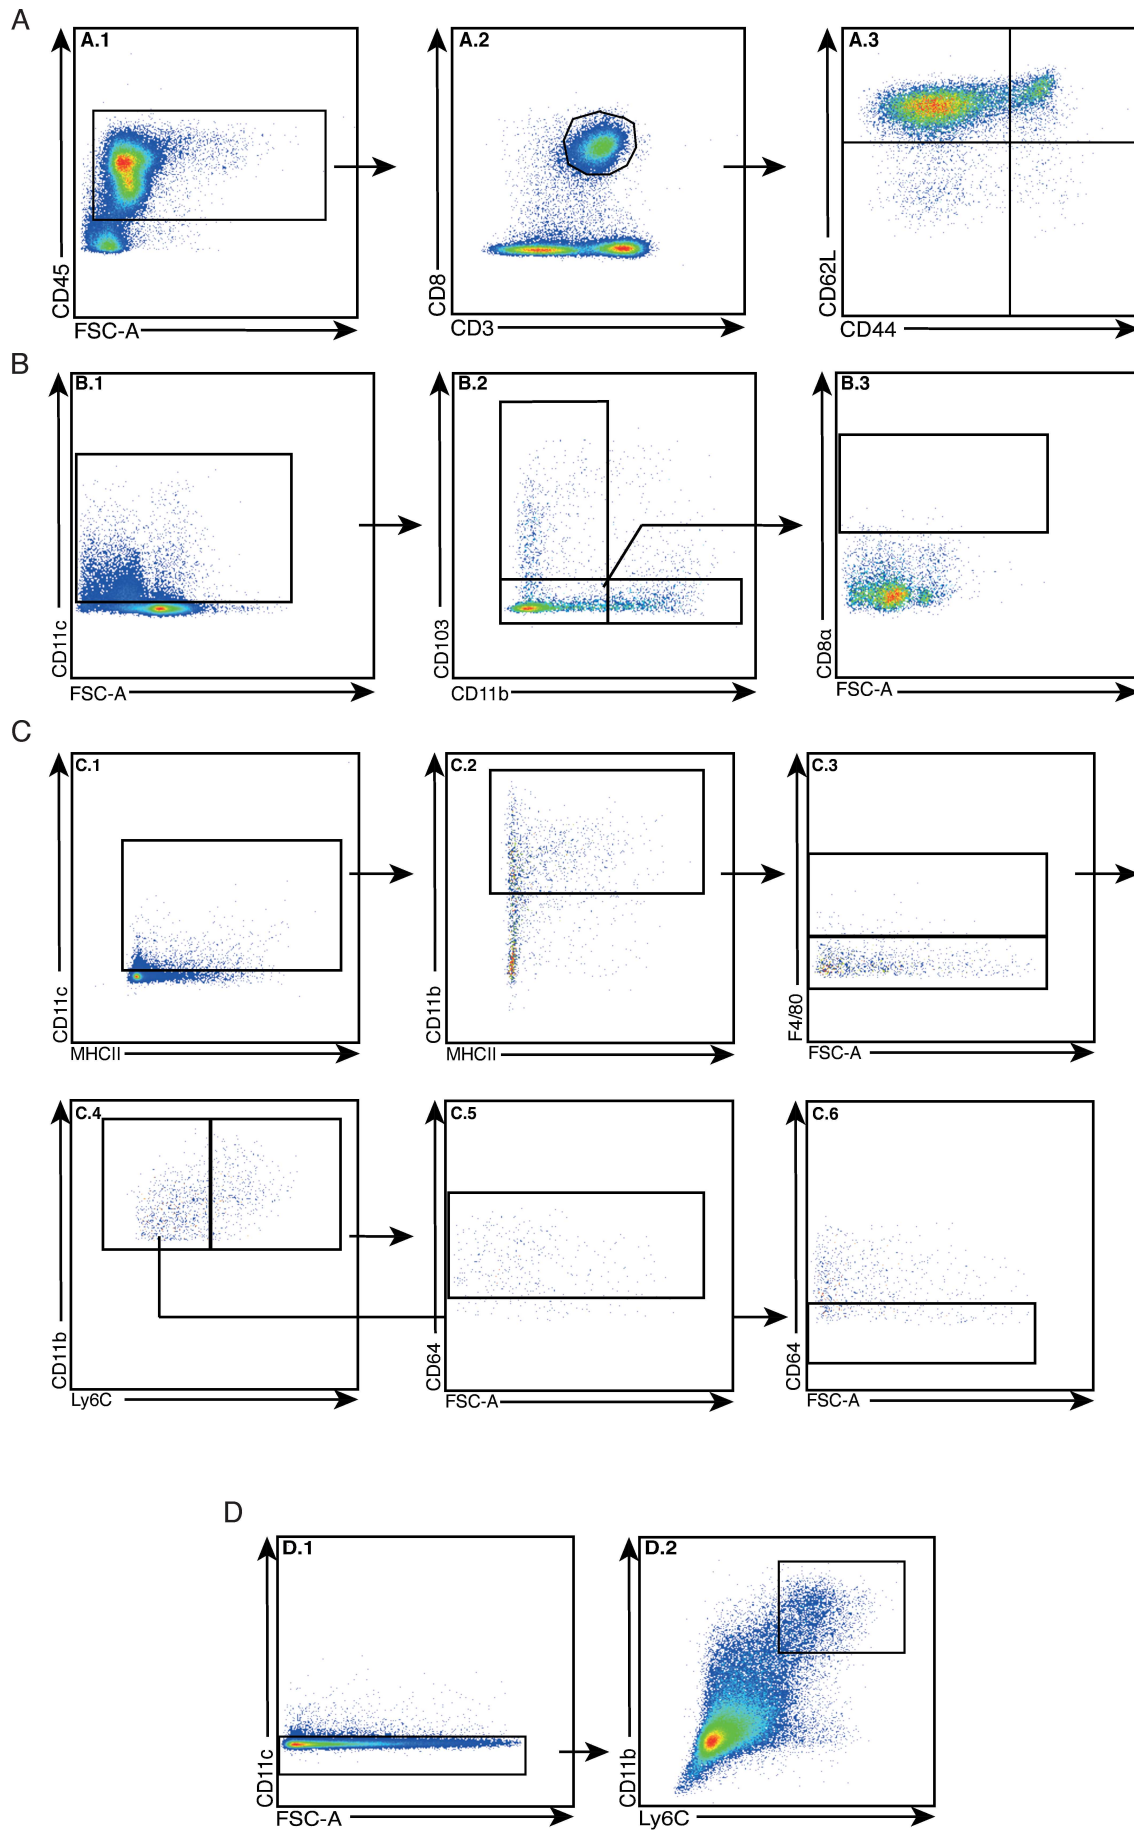

Supplementary figure 11. Gating strategy

**Supplementary table 1. Summary of clinical characteristics of the Dijon cohort**

| Variable                      |                  |         |
|-------------------------------|------------------|---------|
| Sexe-no.(%)                   | Female           | 14 (24) |
|                               | Male             | 45 (76) |
| Age-yr (median, IQR)          |                  | 66 (13) |
| WHO performance status-no.(%) | 0                | 26 (44) |
|                               | 1                | 31 (52) |
|                               | 2                | 2 (1)   |
| Histology-no.(%)              | Nonsquamous-cell | 34 (59) |
|                               | Squamous-cell    | 24 (41) |
|                               | NA               | 2       |
| Stage-no.(%)                  | IIIB             | 8 (14)  |
|                               | IV               | 51 (86) |
| Smoker-no.(%)                 | No               | 6 (10)  |
|                               | Yes              | 53 (90) |

**Univariate and multivariate Cox models for overall survival**

| Features          | HR           | Univariate |           |         | Multivariate |           |         |
|-------------------|--------------|------------|-----------|---------|--------------|-----------|---------|
|                   |              | 95%CI      | p-value   | HR      | 95%CI        | p-value   |         |
| <b>Age</b>        | 0.98         | 0.94-1.02  | p=0.420   | 0.98    | 0.93-1.03    | p=0.344   |         |
| <b>Gender</b>     | Female       | -          | -         | -       | -            | -         |         |
|                   | Male         | 1.16       | 0.53-2.56 | p=0.711 | 0.87         | 0.36-2.12 | p=0.765 |
| <b>WHO PS</b>     | 0            | -          | -         | -       | -            | -         |         |
|                   | ≥1           | 1.00       | 0.52-1.93 | p=0.999 | 1.19         | 0.56-2.52 | p=0.658 |
| <b>Histology</b>  | Non squamous | -          | -         | -       | -            | -         |         |
|                   | Squamous     | 1.22       | 0.62-2.40 | p=0.556 | 0.94         | 0.43-2.08 | p=0.879 |
| <b>Smoker</b>     | Never        | -          | -         | -       | -            | -         |         |
|                   | Ever         | 1.28       | 0.45-3.65 | p=0.642 | 1.21         | 0.34-4.32 | p=0.774 |
| <b>Stage</b>      | IIIB         | -          | -         | -       | -            | -         |         |
|                   | IV           | 0.60       | 0.24-1.49 | p=0.271 | 0.66         | 0.20-2.14 | p=0.491 |
| <b>H.p status</b> | Seronegative | -          | -         | -       | -            | -         |         |
|                   | Seropositive | 3.35       | 1.69-6.66 | p=0.001 | 3.71         | 1.77-7.77 | p=0.001 |

H.p : Helicobacter pylori; WHO PS: World Health Organisation (WHO) performance status

**Univariate and multivariate Cox models for progression free survival**

| Features          | HR           | Univariate |           |         | Multivariate |           |         |
|-------------------|--------------|------------|-----------|---------|--------------|-----------|---------|
|                   |              | 95%CI      | p-value   | HR      | 95%CI        | p-value   |         |
| <b>Age</b>        | 0.95         | 0.92-0.98  | p=0.005   | 0.94    | 0.90-0.98    | p=0.003   |         |
| <b>Gender</b>     | Female       | -          | -         | -       | -            | -         |         |
|                   | Male         | 0.58       | 0.30-1.11 | p=0.102 | 0.74         | 0.34-1.60 | p=0.440 |
| <b>WHO PS</b>     | 0            | -          | -         | -       | -            | -         |         |
|                   | ≥1           | 0.85       | 0.48-1.53 | p=0.595 | 0.88         | 0.46-1.70 | p=0.713 |
| <b>Histology</b>  | Non squamous | -          | -         | -       | -            | -         |         |
|                   | Squamous     | 1.36       | 0.76-2.43 | p=0.304 | 1.76         | 0.87-3.54 | p=0.115 |
| <b>Smoker</b>     | Never        | -          | -         | -       | -            | -         |         |
|                   | Ever         | 0.62       | 0.26-1.47 | p=0.277 | 0.50         | 0.17-1.45 | p=0.203 |
| <b>Stage</b>      | IIIB         | -          | -         | -       | -            | -         |         |
|                   | IV           | 1.41       | 0.60-3.33 | p=0.432 | 1.07         | 0.40-2.84 | p=0.899 |
| <b>H.p status</b> | Seronegative | -          | -         | -       | -            | -         |         |
|                   | Seropositive | 1.39       | 0.75-2.59 | p=0.292 | 1.51         | 0.80-2.84 | p=0.201 |

H.p : Helicobacter pylori; WHO PS: World Health Organisation (WHO) performance status

Supplementary table 2. Summary of clinical characteristics of the Montreal cohort

| Features                     | N = 29                     |                  |
|------------------------------|----------------------------|------------------|
| Age-yrs                      | Median (IQR)               | 65 (46-79)       |
| Sex                          | Female                     | 16 (55%)         |
|                              | Male                       | 13 (45%)         |
| Smoking habits               | Never                      | 1 (3%)           |
|                              | Former or current          | 28 (97%)         |
| Obesity (kg/m <sup>2</sup> ) | Median (IQR)               | 25.7 (15.5-37.5) |
| ECOG                         | 0                          | 14 (48%)         |
|                              | 1-2                        | 15 (52%)         |
| Histology                    | Adenocarcinoma             | 21 (72%)         |
|                              | Squamous-cell              | 7 (25%)          |
|                              | NSCLC                      | 1 (3%)           |
| Stage                        | 3A                         | 3 (10%)          |
|                              | 3B                         | 4 (14%)          |
|                              | 4                          | 22 (76%)         |
| PD-L1 expression             | <1%                        | 7 (24%)          |
|                              | 1-49%                      | 7 (24%)          |
|                              | >50%                       | 13 (45%)         |
|                              | Unknown                    | 2 (7%)           |
| Prior chemotherapy           | No                         | 15 (52%)         |
|                              | Yes                        | 14 (48%)         |
| ICB                          | Atezolizumab               | 2 (7%)           |
|                              | Durvalumab                 | 2 (7%)           |
|                              | Durvalumab/Tremelimumab    | 5 (17%)          |
|                              | Nivolumab                  | 4 (14%)          |
|                              | Nivolumab/Pembrolizumab    | 1 (3%)           |
|                              | Pembrolizumab              | 13 (46%)         |
|                              | Pembrolizumab/Chemotherapy | 1 (3%)           |
|                              | Pembrolizumab/Tremelimumab | 1 (3%)           |
| Progression-free survival    | Median [95%CI]             | 4.4 [2.7-10.8]   |

## Univariate and multivariate Cox models for overall survival

| Features   | Univariate   |           |            | Multivariate |           |           |
|------------|--------------|-----------|------------|--------------|-----------|-----------|
|            | HR           | 95%CI     | p-value    | HR           | 95%CI     | p-value   |
| Age        | 0.97         | 0.91-1.03 | 0.25       | 0.95         | 0.88-1.02 | 0.16      |
| Sex        | Female       | -         | -          | -            | -         | -         |
|            | Male         | 0.83      | 0.29-2.33  | 0.72         | 0.31      | 0.06-1.75 |
| ECOG       | 0            | -         | -          | -            | -         | -         |
|            | ≥1           | 0.90      | 0.32-2.50  | 0.84         | 0.60      | 0.16-2.29 |
| Histology  | ADK          | -         | -          | -            | -         | -         |
|            | EPI          | 1.27      | 0.40-4.02  | 0.68         | 2.97      | 0.43-20.7 |
| Stage      | IIIA-IIIB    | -         | -          | -            | -         | -         |
|            | IV           | 2.37      | 0.53-10.52 | 0.26         | 2.04      | 0.43-9.68 |
| H.p status | Seronegative | -         | -          | -            | -         | -         |
|            | Seropositive | 1.73      | 0.58-5.19  | 0.14         | 2.30      | 0.55-9.59 |

## Univariate and multivariate Cox models for progression free survival

| Features   | Univariate   |           |           | Multivariate |           |           |
|------------|--------------|-----------|-----------|--------------|-----------|-----------|
|            | HR           | 95%CI     | p-value   | HR           | 95%CI     | p-value   |
| Age        | 1.00         | 0.95-1.05 | 0.99      | 0.96         | 0.90-1.04 | 0.31      |
| Sex        | Female       | -         | -         | -            | -         | -         |
|            | Male         | 1.10      | 0.49-2.45 | 0.82         | 0.37      | 0.11-1.23 |
| ECOG       | 0            | -         | -         | -            | -         | -         |
|            | ≥1           | 0.68      | 0.31-1.53 | 0.35         | 0.57      | 0.15-2.16 |
| Histology  | ADK          | -         | -         | -            | -         | -         |
|            | EPI          | 1.71      | 0.68-4.32 | 0.26         | 3.23      | 0.79-13.2 |
| Stage      | IIIA-IIIB    | -         | -         | -            | -         | -         |
|            | IV           | 1.81      | 0.71-4.59 | 0.21         | 2.60      | 0.86-7.86 |
| H.p status | Seronegative | -         | -         | -            | -         | -         |
|            | Seropositive | 2.39      | 1.01-5.65 | 0.048        | 3.53      | 1.05-11.8 |
